# Supplementary material
Source: ML conference proceedings conference paper supplement (https://openreview.net/forum?id=4itprlvbRQ)

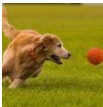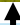

Transformer Block

Transformer Block

Transformer Block

Transformer Block

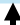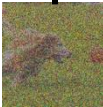

StopGrad

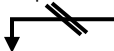

Alignment

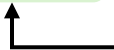

Supplement: supplementary_material [file pull_fig_size_lyersync_end.pdf › LayerSync.io 2/static/figures/pull_fig_size_lyersync_end.pdf]
